# Supplementary material for: The comparative recall of Google Scholar versus PubMed in identical searches for biomedical systematic reviews: a review of searches used in systematic reviews
Source: PubMed Central journal article supplement (PMC3882110; doi:10.1186/2046-4053-2-115), 2013-12-23
Supplement: 2046-4053-2-115-S2.pdf [file 2046-4053-2-115-S2.pdf]

## Systematic reviews included in this article

1. Belsey JD, Geraint M, Dixon TA: **Systematic review and meta analysis: Polyethylene glycol in adults with non-organic constipation.** *Int J Clin Pract* 2010, **64**:944-955.
2. Bomback AS, Derebail VK, McGregor JG, Kshirsagar AV, Falk RJ, Nachman PH: **Rituximab therapy for membranous nephropathy: a systematic review.** *Clin J Am Soc Nephrol* 2009, **4**:734-744.
3. Cassie S, Menezes C, Birch DW, Shi X, Karmali S: **Effect of preoperative weight loss in bariatric surgical patients: A systematic review.** *Surg Obes Relat Dis* 2011, **7**:760-767.
4. Deeba S, Purkayastha S, Darzi A, Zacharakis E: **Obturator hernias: A review of the laparoscopic approach.** *J Minim Access Surg* 2011, **7**:201-204.
5. Donnenwerth MP, Roukis TS: **Outcome of arthroscopic debridement and microfracture as the primary treatment for osteochondral lesions of the talar dome.** *Arthroscopy J Arthroscopic Relat Surg* 2012, **28**:1902-1907.
6. Espinosa de Los Monteros K, Gallo LC: **The relevance of fatalism in the study of Latinas' cancer screening behavior: a systematic review of the literature.** *Int J Behav Med* 2011, **18**:310-318.
7. Gougoulas N, Khanna A, McBride DJ, Maffulli N: **Management of calcaneal fractures: Systematic review of randomized trials.** *Br Med Bull* 2009, **92**:153-167.
8. Gupta K, Kaur K, Aulakh BS, Kaushal S: **Fesoterodine for overactive bladder: A review of the literature.** *Curr Ther Res Clin Exp* 2010, **71**:273-288.
9. Hardefeldt PJ, Eslick GD, Edirimanne S: **Benign thyroid disease is associated with breast cancer: A meta-analysis.** *Breast Cancer Res Treat* 2012, **133**:1169-1177.
10. Hasani-Ranjbar S, Nayebi N, Larijani B, Abdollahi M: **A systematic review of the efficacy and safety of herbal medicines used in the treatment of obesity.** *World J Gastroenterol* 2009, **15**:3073-3085.
11. Jahangiri P, Jazi MS, Keshteli AH, Sadeghpour S, Amini E, Adibi P: **Irritable Bowel Syndrome in Iran: SEPAHAN Systematic Review No. 1.** *Int J Prev Med* 2012, **3**:S1-9.
12. Javan H, Gholami H, Assadi M, Pakdel AF, Sadeghi R, Keshtgar M: **The accuracy of sentinel node biopsy in breast cancer patients with the history of previous surgical biopsy of the primary lesion: Systematic review and meta-analysis of the literature.** *Eur J Surg Oncol* 2012, **38**:95-109.
13. Navarese EP, Buffon A, Andreotti F, Kozinski M, Welton N, Fabiszak T, Caputo S, Grzesk G, Kubica A, Swiatkiewicz I, et al: **Meta-analysis of impact of different types and doses of statins on new-onset diabetes mellitus.** *Am J Cardiol* 2013, **111**:1123-1130.
14. Novak I: **Effective home programme intervention for adults: a systematic review.** *Clin Rehabil* 2011, **25**:1066-1085.
15. Sadeghi R, Gholami H, Zakavi SR, Kakhki VRD, Horenblas S: **Accuracy of 18F-FDG PET/CT for diagnosing inguinal lymph node involvement in penile squamous cell carcinoma: Systematic review and meta-analysis of the literature.** *Clin Nucl Med* 2012, **37**:436-441.

16. Susantitaphong P, Siribamrungwong M, Doi K, Noiri E, Terrin N, Jaber BL: **Performance of urinary liver-type fatty acid-binding protein in acute kidney injury: a meta-analysis.** *Am J Kidney Dis* 2013, **61**:430-439.
17. Verhoeven F, Tanja-Dijkstra K, Nijland N, Eysenbach G, van Gemert-Pijnen L: **Asynchronous and synchronous teleconsultation for diabetes care: a systematic literature review.** *J Diabetes Sci Technol* 2010, **4**:666-684.
18. Wei LA, Fearing MA, Sternberg EJ, Inouye SK: **The Confusion Assessment Method: a systematic review of current usage.** *J Am Geriatr Soc* 2008, **56**:823-830.
19. Wu Z, Ouyang J, He Z, Zhang S: **Infusion of calcium and magnesium for oxaliplatin-induced sensory neurotoxicity in colorectal cancer: A systematic review and meta-analysis.** *Eur J Cancer* 2012, **48**:1791-1798.
20. Yan L, Wang JM, Zeng K: **Association between HLA-DRB1 polymorphisms and pemphigus vulgaris: a meta-analysis.** *Br J Dermatol* 2012, **167**:768-777.
21. Zhu Y, Hu X, Wang J, Chen J, Guo Q, Li C, Enck P: **Processing of food, body and emotional stimuli in anorexia nervosa: A systematic review and meta-analysis of functional magnetic resonance imaging studies.** *Eur Eating Disord Rev* 2012, **20**:439-450.
